# Supplementary material for: Eco-compatible solvent-processed high energy level offset ternary strategy for efficient organic photodetecting and photovoltaic applications
Source: Royal Society of Chemistry journal article supplement (doi:10.1039/d3tc01527k), 2023-01-01
Supplement: d3tc01527k1.pdf [file d3tc01527k1.pdf]

Supplementary Information

**Eco-Compatible Solvent-Processed High Energy Level Offset Ternary Strategy for Efficient Organic Photodetecting and Photovoltaic Applications**

Min Soo Kim, Woongsik Jang, Byung Gi Kim, and Dong Hwan Wang\*

School of Integrative Engineering, Chung-Ang University, 84 Heukseok-ro, Dongjak-gu, Seoul, 06974, Republic of Korea

\* Corresponding author, E-mail address: king0401@cau.ac.kr (Prof. D.H. Wang)

Keywords: non-halogenated solvent; ternary; photocurrent; dark current; non-fullerene acceptor; organic electronic device

## Materials

Poly(3,4-ethylenedioxythiophene):polystyrene sulfonate (PEDOT:PSS) (AI4083) as a hole transport material and 2,9-bis[3-[[3-(dimethylamino)propyl]amino]propyl]-anthra[2,1,9-def:6,5,10-d'e'f']diisoquinoline-1,3,8,10(2H,9H)-tetrone (PDINN) as an electron transport material were purchased from Heraeus and 1-Material, respectively. Poly[(2,6-(4,8-bis(5-(2-ethylhexyl-3-fluoro)thiophen-2-yl)-benzo[1,2-b:4,5-b']dithiophene))-alt-(5,5-(1',3'-di-2-thienyl-5',7'-bis(2-ethylhexyl)benzo[1',2'-c:4',5'-c']dithiophene-4,8-dione)] (PM6) as donor material and 2,2'-((2Z,2'Z)-((12,13-bis(2-butyloctyl)-3,9-diundecyl-12,13-dihydro-[1,2,5]thiadiazolo[3,4-e]thieno[2'',3'':4',5']thieno[2',3':4,5]pyrrolo[3,2-g]thieno[2',3':4,5]thieno[3,2-b]indole-2,10-diyl)bis(methanylylidene))bis(5,6-difluoro-3-oxo-2,3-dihydro-1H-indene-2,1-diylidene))dimalononitrile (BTP-4F-12) as electron acceptors were purchased from Brilliant Matters. 5,5'-[[4,4,9,9-tetrakis(2-ethylhexyl)-4,9-dihydro-s-indaceno[1,2-b:5,6-b']dithiophene-2,7-diyl]bis(2,1,3-benzothiadiazole-7,4-diylmethylidyne)]bis[3-ethyl-2-thioxo-4-thiazolidinone] (EH-IDTBR) as electron acceptor was purchased from 1-Material.

## Device fabrication

The glass/ITO substrates were cleaned by sonication for 30 min with distilled water, acetone, and 2-propanol (IPA) sequentially and then blown with nitrogen gas to eliminate any residual solvent. Before spin coating the PEDOT:PSS layer onto the glass/ITO

substrate, the cleaned substrates were UV-ozone treated for 10 min for hydrophilic surface modification. The PEDOT:PSS as a hole transport layer was spin coated at 5000 rpm for 40 s and thermally treated at 140 °C for 10 min. The PM6:EH-IDTBR-BTP-4F-12 solution as photoactive material (at a concentration of 22 mg mL<sup>-1</sup>) was dissolved by O-xylene as the host solvent. The PM6:EH-IDTBR:BTP-4F-12 solution was spin coated onto the PEDOT:PSS-coated substrates and thermally treated at 150 °C for 10 min in a glove box to remove any residual solvents. Then, PDINN (1 mg mL<sup>-1</sup> in MeOH) as an electron transporting layer was spin coated at 3000 rpm for 30 s in a glove box. Finally, an Ag cathode of thickness 100 nm was thermally evaporated onto the prepared device using a shadow mask at  $4.0 \times 10^{-6}$  Torr by a thermal evaporator.

## **Characterization**

UV-visible spectroscopy (PerkinElmer Lambda 365) measurements were used to investigate the light absorption of the photoactive layer. All photovoltaic parameters were measured using the solar simulator (Peccell Tech, Inc., PEC-L01) under 1-sun illumination (AM 1.5 G 100 mW cm<sup>-2</sup>) calibrated with a silicon reference device. The J-V characteristics, SCLC, and impedance spectroscopy of the devices were measured by an electrical measurement system (ZIVE SP1). The EQE spectra were measured through a monochromator (Dongwoo Optron Co. Ltd., MonoRa-500i) after power calibration (ABET Tech, Inc., LS150). The transient photocurrent was measured by an oscilloscope (TBS2072, Tektronix, Inc., Beaverton, Oregon, United States) with a variable-gain amplifier (DLPCA-200, Femto Messtechnik GmbH, Berlin, Germany) under customised LED illumination (LED PLC Light, Grace Lighting Int'l Co, Hong Kong). AFM images

were obtained by non-contact mode (Park NX10, Park Systems). The PL spectra of the photoactive layer was obtained using a Hitachi F-7000 fluorescence spectrophotometer at an excitation wavelength of 600 nm. The thickness images of the photoactive layer were observed by field-emission scanning electron microscopy (FE-SEM, SIGMA, Carl Zeiss, Inc.) at 5 kV. The contact angle images were measured by Phoenix-10 (SEO).

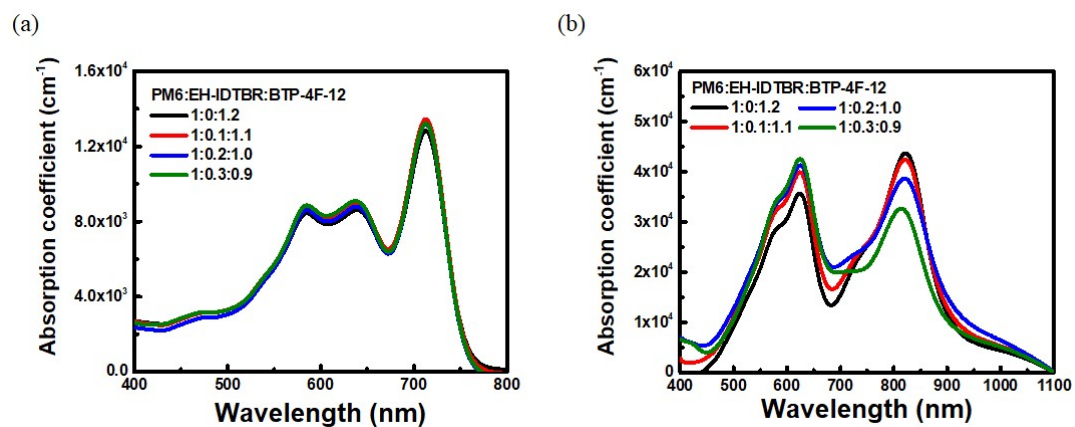

**Figure. S1.** Absorption coefficient from the UV-vis spectra for the EH-IDTBR-ratio-dependent (a) solution, (b) thin film state of photoactive materials.

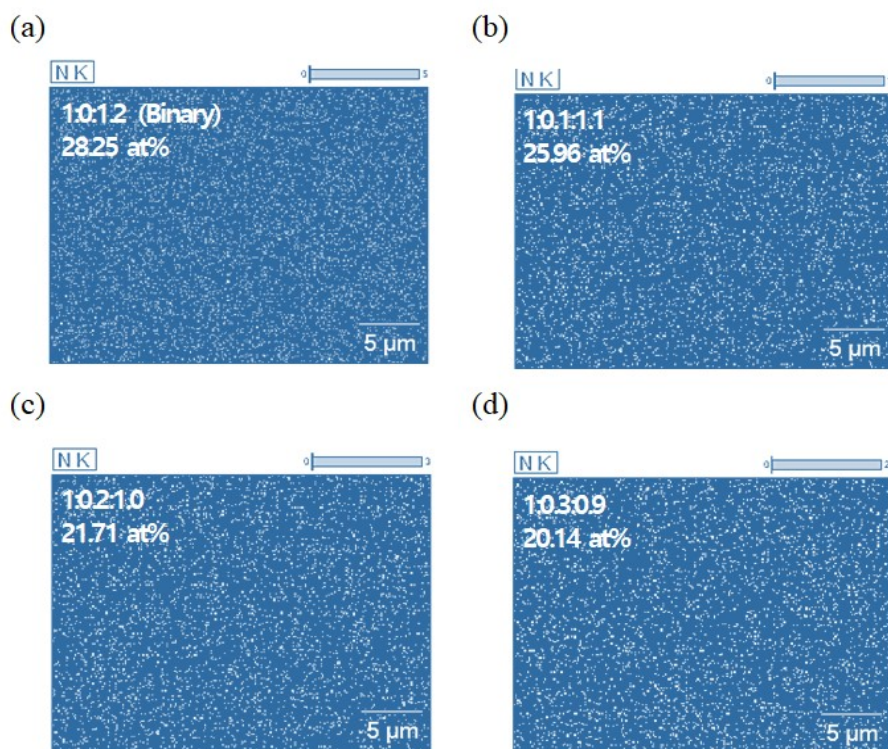

**Figure. S2.** EDS elemental mapping of N of the binary (a) 0, and (b) 0.1, (c) 0.2 , and (d) 0.3 ratios of EH-IDTBR added ternary photoactive layer.

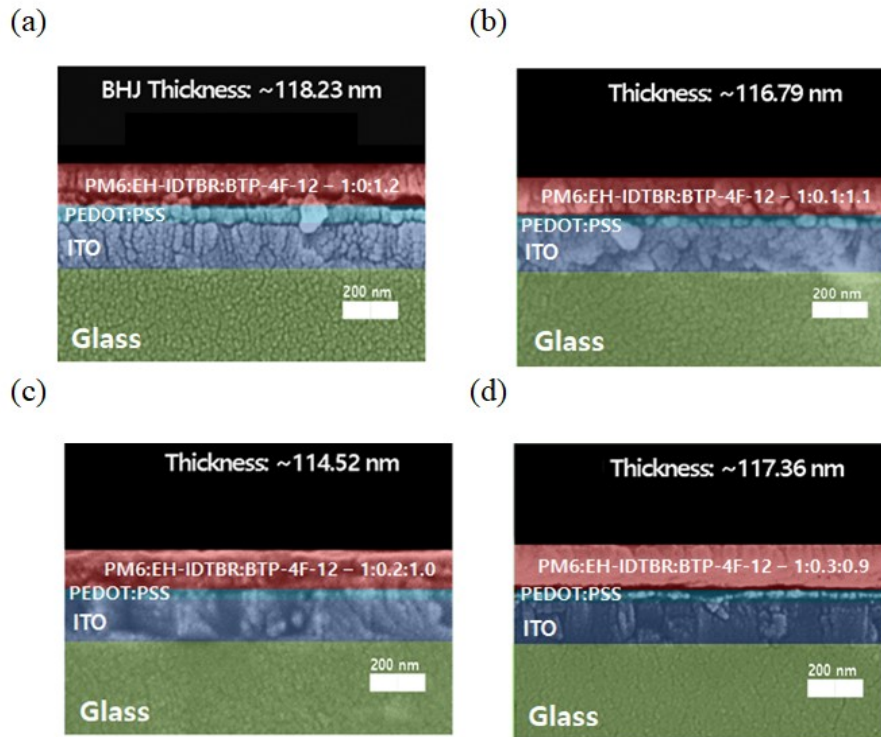

**Figure. S3.** Thickness of the (a) binary, and (b) 0.1, (c) 0.2, and (d) 0.3 ratios of EH-IDTBR added ternary photoactive layer from the cross-sectional FE-SEM images.

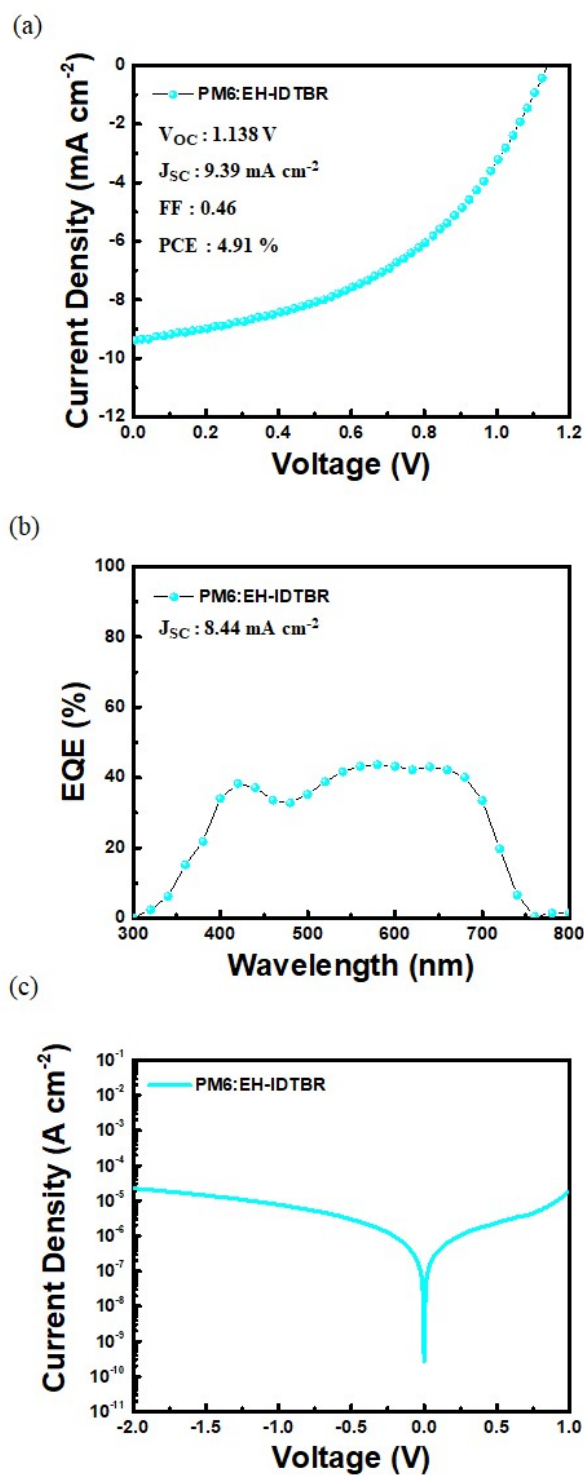

**Figure. S4.** (a) J-V characteristics of the PM6:EH-IDTBR-based device under AM 1.5G irradiation at 100 mW cm<sup>-2</sup> and its (b) EQE spectrum. (c) J-V characteristics of the PM6:EH-IDTBR devices under dark condition.



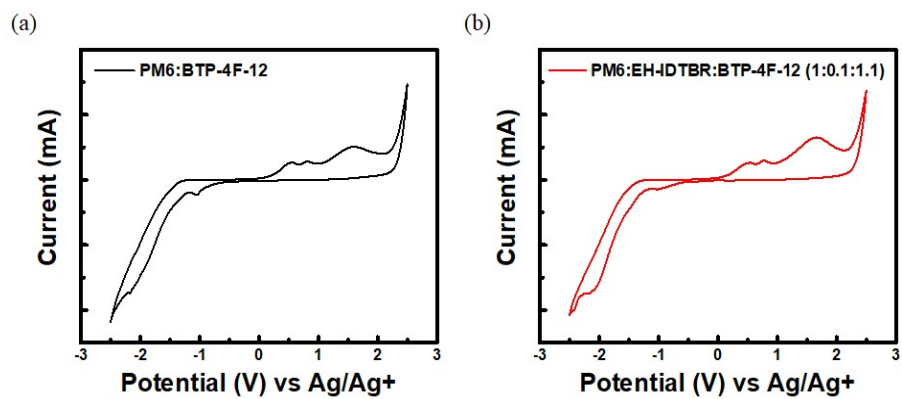

**Figure. S5.** Cyclic voltammetry curve of the (a) binary (PM6:BTP-4F-12) and (b) optimised ternary (PM6:EH-IDTBR:BTP-4F-12, 1:0.1:1.1) active layers.

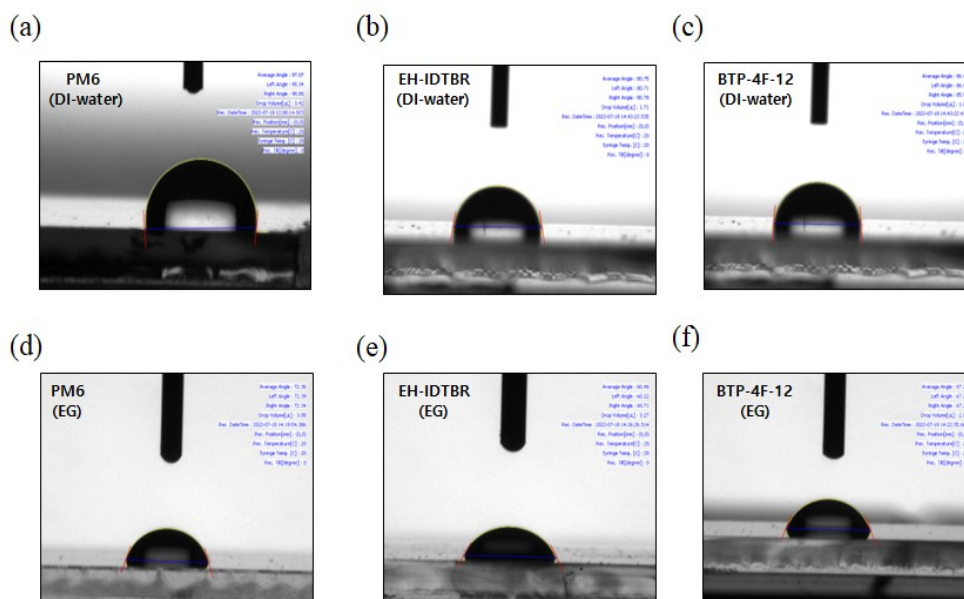

**Figure. S6.** Contact angle images of the PM6, EH-IDTBR, and BTP-4F-12 with (a–c) deionised water and (d–f) ethylene glycol (EG).

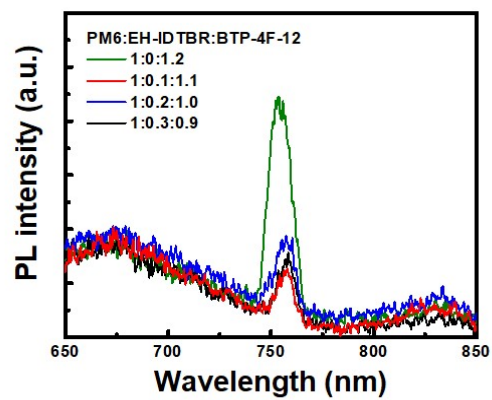

**Figure. S7.** PL intensities of the EH-IDTBR-ratio-dependent photoactive layer.

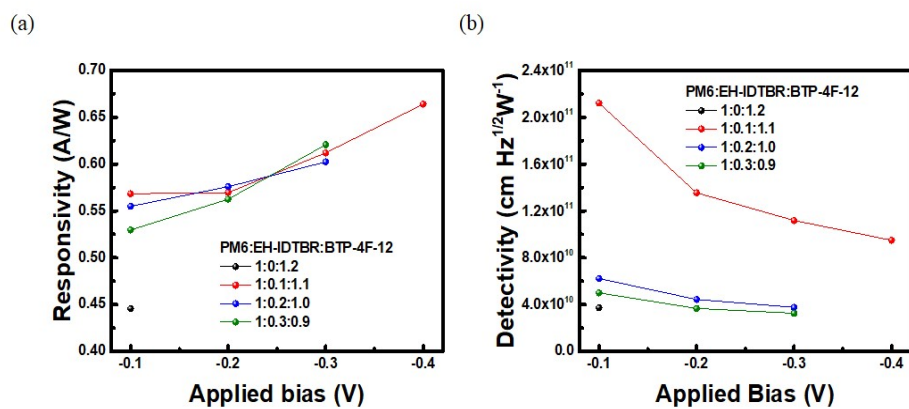

**Figure. S8.** Applied-bias-dependent device (a) responsivity and (b) detectivity stabilities of the binary and EH-IDTBR-ratio-dependent ternary devices.

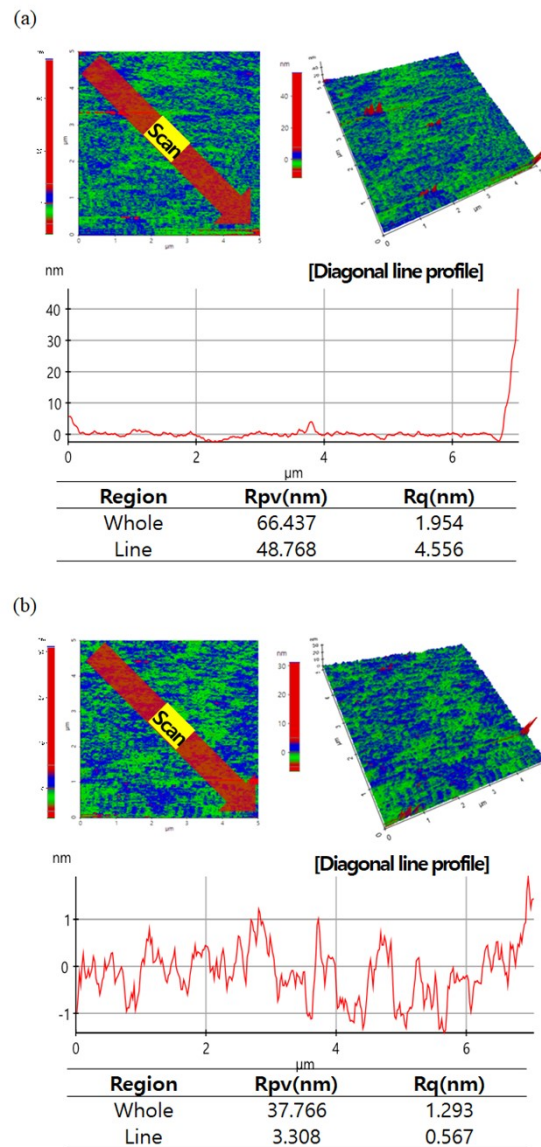

**Figure. S9.** Three-dimensional AFM height images of the after applying bias (-0.1 V) for 600 s for the (a) binary and (b) optimised ternary photoactive layers.

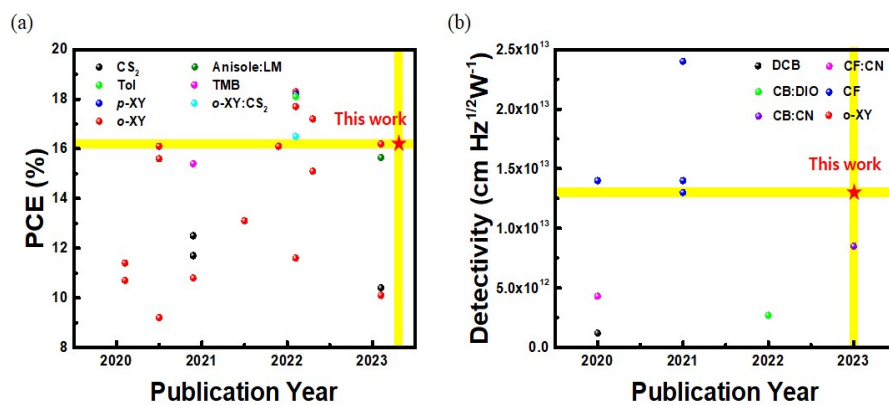

**Figure. S10.** Recently reported (a) OSCs performances based on non-halogenated solvent (b) self-powered OPDs ( $> 10^{12} \text{ cm Hz}^{1/2} \text{ W}^{-1}$ ).

**Table S1.** Surface energies of the PM6, EH-IDTBR, BTP-4F-12 layers based on contact angle measurements.

|               | Contact angle (degree) |                                 | $\gamma_{sv}^{dispersive}$<br>(mJ m <sup>-2</sup> ) | $\gamma_{sv}^{dispersive}$<br>(mJ m <sup>-2</sup> ) | $\gamma_{sv}$<br>(mJ m <sup>-2</sup> ) |
|---------------|------------------------|---------------------------------|-----------------------------------------------------|-----------------------------------------------------|----------------------------------------|
|               | DI-water<br>(polar)    | Ethylene glycol<br>(dispersive) |                                                     |                                                     |                                        |
| A (PM6)       | 97.07                  | 72.36                           | 6.46                                                | 5.81                                                | 12.27                                  |
| B (EH-IDTBR)  | 80.75                  | 60.46                           | 18.41                                               | 6.23                                                | 24.64                                  |
| C (BTP-4F-12) | 86.44                  | 67.24                           | 14.74                                               | 8.60                                                | 23.34                                  |

**Table S2.** Calculated charge mobility and trap density from the SCLC plots of the EH-IDTBR-ratio-dependent active-layer-based devices.

|           | Mobility ( $\text{cm}^2 \text{V}^{-1} \text{s}^{-1}$ ) |                      | Trap-density ( $\# \text{cm}^{-3}$ ) |                      |
|-----------|--------------------------------------------------------|----------------------|--------------------------------------|----------------------|
|           | Hole-only                                              | Electron-only        | Hole-only                            | Electron-only        |
| 1:0:1.2   | $4.8 \times 10^{-5}$                                   | $2.7 \times 10^{-5}$ | $1.2 \times 10^{16}$                 | $9.7 \times 10^{15}$ |
| 1:0.1:1.1 | $3.9 \times 10^{-5}$                                   | $2.6 \times 10^{-5}$ | $1.0 \times 10^{16}$                 | $4.8 \times 10^{15}$ |
| 1:0.2:1.0 | $3.5 \times 10^{-5}$                                   | $2.2 \times 10^{-5}$ | $1.0 \times 10^{16}$                 | $5.5 \times 10^{15}$ |
| 1:0.3:0.9 | $1.1 \times 10^{-5}$                                   | $1.1 \times 10^{-4}$ | $9.5 \times 10^{15}$                 | $7.6 \times 10^{15}$ |



**Table S3.** Fitted values for the equivalent circuit from impedance spectroscopy.

|           | $R_{CT}$ ( $\Omega$ ) | $R_{REC}$ ( $\Omega$ ) |
|-----------|-----------------------|------------------------|
| 1:0:1.2   | 16.3                  | 981                    |
| 1:0.1:1.1 | 11.4                  | 5822                   |
| 1:0.2:1.0 | 11.9                  | 3373                   |
| 1:0.3:0.9 | 13.9                  | 2051                   |

**Table S4.** Recently reported OSCs performances based on non-halogenated solvents.

| Solvent              | Materials                    | PCE (%) | Ref. |
|----------------------|------------------------------|---------|------|
| CS <sub>2</sub>      | PBDB-T:ITIC                  | 10.4    | [1]  |
| CS <sub>2</sub>      | PM7:IT-4F                    | 11.7    | [2]  |
| CS <sub>2</sub>      | PM7:IT-4Cl                   | 12.5    | [2]  |
| TMB                  | PM6:Y6                       | 15.4    | [3]  |
| Tol                  | PM6:BO-4Cl-Y6-1O             | 18.1    | [4]  |
| Anisole:LM           | PBNT-TzTz:Y6-BO              | 15.7    | [5]  |
| p-XY                 | PM6:BO-4Cl:1O                | 18.2    | [4]  |
| o-XY:CS <sub>2</sub> | PM6:Y6                       | 16.5    | [6]  |
| o-XY                 | PM7:IT-4Cl                   | 10.8    | [2]  |
| o-XY                 | PM6:Y6                       | 15.6    | [3]  |
| o-XY                 | PM6:Y6                       | 11.6    | [4]  |
| o-XY                 | PM6:BO-4Cl:Y6-1O             | 18.3    | [4]  |
| o-XY                 | PM6:BO-4Cl                   | 17.7    | [4]  |
| o-XY                 | PTB7-Th:F10IC2               | 10.7    | [7]  |
| o-XY                 | PTB7-Th:F10IC2               | 11.4    | [7]  |
| o-XY                 | PM6:YSe-C6                   | 16.1    | [8]  |
| o-XY                 | PM6:PY2F-T                   | 13.1    | [9]  |
| o-XY                 | PPDT2FBT:PC <sub>61</sub> BM | 9.2     | [10] |
| o-XY                 | PM6:DTY6                     | 16.1    | [11] |
| o-XY                 | PM6:BTP-eC9                  | 17.2    | [12] |
| o-XY                 | PM6:Y6                       | 15.1    | [12] |
| o-XY                 | D18:BTP-eC9                  | 16.2    | [13] |

|      |                        |      |           |
|------|------------------------|------|-----------|
| o-XY | TPD-3F:IT-4F           | 10.1 | [14]      |
| o-XY | PM6:EH-IDTBR:BTP-4F-12 | 16.2 | This work |

---

**Table S5.** Recently reported high performance ( $> 10^{12}$  cm Hz<sup>1/2</sup> W<sup>-1</sup>) self-powered OPDs.

| Solvent            | Materials              | Detectivity<br>(Jones, @ 0 V bias) | Ref.      |
|--------------------|------------------------|------------------------------------|-----------|
| DCB                | P3HT:PTB7              | $1.2 \times 10^{12}$ (745 nm)      | [15]      |
| CF:CN (1 vol%)     | PTB7-Th:W1             | $4.3 \times 10^{12}$ (830 nm)      | [16]      |
| CF                 | PolyTPD:SBDTIC         | $1.4 \times 10^{13}$ (740 nm)      | [17]      |
| CF                 | PM6:PDTTIC-4F          | $2.4 \times 10^{13}$ (920 nm)      | [18]      |
| CF                 | D18:Y6                 | $1.4 \times 10^{13}$ (805 nm)      | [19]      |
| CF                 | PM6:PDTTIC-4F          | $1.3 \times 10^{13}$ (900 nm)      | [20]      |
| CB:DIO (0.75 vol%) | PM6:IT-4F              | $2.7 \times 10^{12}$ (770 nm)      | [21]      |
| CB:CN (0.5 vol%)   | PM6:Y6                 | $8.5 \times 10^{12}$ (840 nm)      | [22]      |
| o-XY               | PM6:EH-IDTBR:BTP-4F-12 | $1.3 \times 10^{13}$ (840 nm)      | This work |

## References

- [1] ACS Appl. Energy Mater. 2023, **6**, 3, 1595–1604
- [2] Org. Electron., 2020, **85**, 105871
- [3] Adv. Mater., 2020, **32**, 2002302
- [4] Adv. Funct. Mater., 2022, **32**, 2107827
- [5] Mater. Horiz., 2023, **10**, 473-482
- [6] Nano Energy, 2022, **91**, 106678
- [7] Sol. RRL, 2020, **4**, 2000108
- [8] J. Mater. Chem. A, 2021, **9**, 24622—24630
- [9] Adv. Funct. Mater., 2021, **31**, 2100791
- [10] Sol. RRL, 2021, **5**, 2100213
- [11] Joule, 2020, **4**, 2004—2016
- [12] Energy Environ. Sci., 2022, **15**, 2130—2138
- [13] Adv. Energy Mater. 2023, **13**, 2203465
- [14] J. Mater. Chem. A, 2023, **11**, 2419-2430
- [15] ACS Appl. Mater. Interfaces 2020, **12**, 11, 13061–5155
- [16] ACS Appl. Mater. Interfaces. 2020, **12**, 39515–39523
- [17] Adv. Opt. Mater. 2020, **8**, 1902056
- [18] J. Am. Chem. Soc. 2021, **143**, 4281–4289
- [19] Adv. Funct. Mater. 2021, **22**, 2106326
- [20] ACS Materials Lett. 2022, **4**, 882–890
- [21] ACS Appl. Electron. Mater. 2022, **4**, 1567–1575
- [22] ACS Sustainable Chem. Eng. 2023, **11**, 625–637
